# Supplementary material
Source: publisher figshare collection journal article supplement (https://acs.figshare.com/ndownloader/files/13109816)
Supplement: Supplementary file 1 [file 13109816]

Compound_ID	SMILES
1	CC1(C)[C@@H](O)CC[C@]2(C)C3=C([C@@]4(CC[C@@H]([C@]4(CC3)C)[C@H](C)CCCC(C)C)C)CC[C@@]12[H]
2	CC1(C)[C@@H](O)CC[C@]2(C)C3=C([C@@]4(CC[C@@H]([C@]4(CC3)C)[C@H](C)CCC5C(C)(O5)C)C)CC[C@@]12[H]
3	CC1(C)[C@@H](O)CC[C@]2(C)C3=C([C@@]4(CC[C@@H]([C@]4(CC3)C)[C@H](C)CCC=O)C)CC[C@@]12[H]
4	CC1(C)[C@@H](O)CC[C@]2(C)C3=C([C@@]4(CC[C@@H]([C@]4(CC3)C)[C@H](C)CC/C=N/O)C)CC[C@@]12[H]
5	CC1(C)[C@@H](O)CC[C@]2(C)C3=C([C@@]4(CC[C@@H]([C@]4(CC3)C)[C@H](C)CCCN(CC)CC)C)CC[C@@]12[H]
6	CC1(C)[C@@H](O)CC[C@]2(C)C3=C([C@@]4(CC[C@@H]([C@]4(CC3)C)[C@H](C)CCCC(C)(O)C)C)CC[C@@]12[H]
7	CC1(C)[C@@H](O)CC[C@]2(C)C3=C([C@@]4(CC[C@@H]([C@]4(CC3)C)[C@H](C)CC/C=C(CO)\C)C)CC[C@@]12[H]
8	CC1(C)[C@@H](O)CC[C@]2(C)C3=C([C@@]4(CC[C@@H]([C@]4(CC3)C)[C@H](C)CCCO)C)CC[C@@]12[H]
9	CC1(C)[C@@H](O)CC[C@]2(C)C3=C([C@@]4(CC[C@@H]([C@]4(CC3)C)[C@H](C)CCC(C(C)(O)C)=O)C)CC[C@@]12[H]
10	CC1(C)[C@@H](O)CC[C@]2(C)C3=C([C@@]4(CC[C@@H]([C@]4(CC3)C)[C@H](C)CCC(O)C(C)(O)C)C)CC[C@@]12[H]
11	CC1(C)[C@@H](O)CC[C@]2(C)C3=C([C@@]4(CC[C@H]([C@H](C)CCCC(OC5O[C@@H](CO)C(O)C(O)[C@@H]5O)(C)C)[C@]4(CC3)C)C)CC[C@@]12[H]
12	CC1(C)[C@@H](OC(C)=O)CC[C@]2(C)C3=C([C@@]4(CC[C@H]([C@H](C)CC/C=C(C)/C)[C@]4(CC3)C)C)CC[C@@]12[H]
13	CC1(C)[C@@H](OC)CC[C@]2(C)C3=C([C@@]4(CC[C@H]([C@H](C)CC/C=C(C)/C)[C@]4(CC3)C)C)CC[C@@]12[H]
14	CC1(C)C(CC[C@]2(C)C3=C([C@@]4(CC[C@H]([C@H](C)CC/C=C(C)/C)[C@]4(CC3)C)C)CC[C@@]12[H])=O
15	CC1(C)/C(CC[C@]2(C)C3=C([C@@]4(CC[C@H]([C@H](C)CC/C=C(C)/C)[C@]4(CC3)C)C)CC[C@@]12[H])=N/O
16	CC1(C)/C(CC[C@]2(C)C3=C([C@@]4(CC[C@H]([C@H](C)CC/C=C(C)/C)[C@]4(CC3)C)C)CC[C@@]12[H])=N/OC
17	CC1(C)[C@@H](N)CC[C@]2(C)C3=C([C@@]4(CC[C@H]([C@H](C)CC/C=C(C)/C)[C@]4(CC3)C)C)CC[C@@]12[H]
18	CC1(C)[C@@H](OC(C)=O)CC[C@]2(C)C3=C([C@@]4(CC[C@H]([C@H](C)CCCC(C)(O)C)[C@]4(CC3)C)C)CC[C@@]12[H]
19	CC1(C)C(OC)CC[C@]2(C)C3=C([C@@]4(CC[C@H]([C@H](C)CCCC(C)(O)C)[C@]4(CC3)C)C)CC[C@@]12[H]
20	CC1(C)C(CC[C@]2(C)C3=C([C@@]4(CC[C@H]([C@H](C)CCCC(C)(O)C)[C@]4(CC3)C)C)CC[C@@]12[H])=O
21	CC1(C)/C(CC[C@]2(C)C3=C([C@@]4(CC[C@H]([C@H](C)CCCC(C)(O)C)[C@]4(CC3)C)C)CC[C@@]12[H])=N/O
22	CC1(C)/C(CC[C@]2(C)C3=C([C@@]4(CC[C@H]([C@H](C)CCCC(C)(O)C)[C@]4(CC3)C)C)CC[C@@]12[H])=N/OC
23	CC1(C)[C@@H](N)CC[C@]2(C)C3=C([C@@]4(CC[C@H]([C@H](C)CCCC(C)(O)C)[C@]4(CC3)C)C)CC[C@@]12[H]
24	C[C@]12C(CC[C@@]3([H])C(CO)(CO)/C(CC[C@]43C)=N/OC)=C4CC[C@]1(C)[C@@H]([C@H](C)CCCC(C)(O)C)CC2
25	CC1([C@@]2(CCC3=C([C@@]2(C)CCC(N1)=O)CC[C@]4(C)[C@@H]([C@H](C)CCCC(C)(O)C)CC[C@]43C)[H])C
26	CC1(C)[C@@H](OC(CCC(O)=O)=O)CC[C@]2(C)C3=C([C@@]4(CC[C@H]([C@H](C)CCCC(C)(O)C)[C@]4(CC3)C)C)CC[C@@]12[H]
27	CC1(C)[C@@H](OCC(O)=O)CC[C@]2(C)C3=C([C@@]4(CC[C@H]([C@H](C)CCCC(C)(O)C)[C@]4(CC3)C)C)CC[C@@]12[H]
28	CC1(C)[C@@H](O)CC[C@]2(C)[C@@]3(O4)CC[C@]5(C)[C@@H]([C@H](C)CCCC(C)(O)C)CC[C@](C)5[C@@]34CC[C@@]12[H]
29	CC1(C)[C@@H](O)CC[C@]2(C)C3=CC[C@]4(C)[C@@H]([C@H](C)CCCC(C)(O)C)CC[C@](C)4C3=CC[C@@]12[H]
30	CC1(C)[C@@H](O)CC[C@]2(C)[C@@]3(O)CC[C@]4(C)[C@@H]([C@H](C)CCCC(C)(O)C)CC[C@](C)4C3CC[C@@]12[H]
31	CC(C)([C@]1([H])C2)[C@@H](O)CC[C@]1(C)C3=C([C@@]4(CC[C@H]([C@H](C)CCCC(C)(O)C)[C@]4(CC3=O)C)C)C2=O
32	CC1(C)OC(CC[C@]2(C)[C@@]3(O4)CC[C@]5(C)[C@@H]([C@H](C)CCCC(C)(O)C)CC[C@](C)5[C@@]34CC[C@@]12[H])=O
33	OC(C)([C@]1([H])CC[C@]23[C@@]4(CC[C@H]([C@H](C)CCCC(C)(O)C)[C@]4(CC[C@]2(O3)[C@@]1(C)CCC(O)=O)C)C)C
34	CC(C)([C@](CC[C@@]12O3)4[H])/C(CC[C@]4(C)[C@@]13CC[C@]5(C)[C@@H]([C@H](C)CCCC(C)(O)C)CC[C@]52C)=N/O
35	CC1(C)[C@@H](O)[C@H](F)C[C@]2(C)C3=C([C@@]4(CC[C@@H]([C@]4(CC3)C)[C@H](C)CCCC(C)(O)C)C)CC[C@@]12[H]
36	CC1(C)[C@H](O)[C@H](F)C[C@]2(C)C3=C([C@@]4(CC[C@@H]([C@]4(CC3)C)[C@H](C)CCCC(C)(O)C)C)CC[C@@]12[H]
37	CC1(C)[C@@H](O)[C@H](O)C[C@]2(C)C3=C([C@@]4(CC[C@@H]([C@]4(CC3)C)[C@H](C)CCCC(C)(O)C)C)CC[C@@]12[H]
